# Supplementary material for: Rigid-body Ligand Recognition Drives Cytotoxic T-lymphocyte Antigen 4 (CTLA-4) Receptor Triggering
Source: PubMed Central journal article supplement — J Biol Chem. 2010 Dec 14;286(8):6685–96. doi: 10.1074/jbc.M110.182394 (PMC3057841; doi:10.1074/jbc.m110.182394), 2010-12-14
Supplement: supp_M110.182394_jbc.M110.182394-1.pdf [file supp_M110.182394_jbc.M110.182394-1.pdf]

**Table S1:** Data processing statistics

| Data Processing                    |                                               |
|------------------------------------|-----------------------------------------------|
| Resolutions(Å)(Outer shell)        | 25–1.8 (2.00-1.80)                            |
| Cell constant(Å)(a, b, c)          | 43.86, 51.46, 102.85                          |
| Space group                        | P2 <sub>1</sub> 2 <sub>1</sub> 2 <sub>1</sub> |
| No. of measured reflections        | 211,670                                       |
| No. of unique reflections          | 22,222 (5,907)                                |
| Completeness (%)                   | 99.7 (99.4)                                   |
| R <sub>merge</sub> (%)             | 11.1 (33.8)                                   |
| I/s(I)                             | 10.33 (3.19)                                  |
| Refinement                         |                                               |
| Resolutions (Å) (Outer)            | 25.0–1.8(1.88-1.8)                            |
| No. of reflections used            | 22,219 (2,550)                                |
| R factor                           | 0.1994 (0.2753)                               |
| R <sub>free</sub>                  | 0.2752 (0.3453)                               |
| Completeness (Outer)               | 1.0 (0.99)                                    |
| No. of atoms                       |                                               |
| Protein                            | 1,835                                         |
| Suger                              | 28                                            |
| Glycerol                           | 12                                            |
| Water                              | 228                                           |
| R. m. s. deviations                |                                               |
| Bond lengths(Å)                    | 0.010                                         |
| Bond angles(°)                     | 1.2                                           |
| Average B factors(Å <sup>2</sup> ) |                                               |
| Main chain                         | 32.237                                        |
| Side chain                         | 36.497                                        |
| Suger                              | 59.504                                        |
| Glycerol                           | 48.485                                        |
| Water                              | 34.095                                        |

$$R_{\text{merge}} = \frac{\sum |I - \langle I \rangle|}{\sum \langle I \rangle}$$

$$R_{\text{cryst}} = \frac{\sum ||F_{\text{obs}}| - |F_{\text{calc}}||}{\sum |F_{\text{obs}}|}$$

R<sub>free</sub> = as for R<sub>cryst</sub> but calculated for test set comprising reflections not used in refinement.

Root mean squared deviations (Rmsd) in bond length and angles are given from ideal values.

**Table S2:** Comparison of chains A and B of apo CTLA-4 and the CTLA-4 monomers in the CD80, CD86 and lipocalin complexes.

| Structure comparisons |                                    | r.m.s.d.<br>Å <sup>2</sup> * | No. of<br>residues |
|-----------------------|------------------------------------|------------------------------|--------------------|
| apo CTLA-4 mol A      | - apo CTLA-4 Mol B                 | 1.13                         | 117                |
|                       | CTLA-4 mol C complexed with CD80   | 0.91                         | 117                |
|                       | CTLA-4 mol B complexed with CD80   | 0.91                         | 116                |
|                       | CTLA-4 mol C complexed with CD86   | 0.95                         | 116                |
|                       | CTLA-4 mol C complexed with CD86   | 1.02                         | 108                |
|                       | CTLA-4 complexed with lipocalin    | 1.26                         | 116                |
|                       | murine CTLA-4                      | 1.46                         | 116                |
|                       | CD28                               | 1.62                         | 107                |
|                       | PD-1                               | 1.82                         | 105                |
| apo CTLA-4 Mol B      | - CTLA-4 mol C complexed with CD80 | 0.85                         | 116                |
|                       | CTLA-4 mol B complexed with CD80   | 0.93                         | 116                |
|                       | CTLA-4 mol C complexed with CD86   | 1.08                         | 114                |
|                       | CTLA-4 mol C complexed with CD86   | 0.85                         | 107                |
|                       | CTLA-4 complexed with lipocalin    | 1.03                         | 113                |
|                       | murine CTLA-4                      | 1.23                         | 112                |
|                       | CD28                               | 1.41                         | 105                |
|                       | PD-1                               | 1.71                         | 103                |

\* R.m.s. differences were calculated using Coot (39).

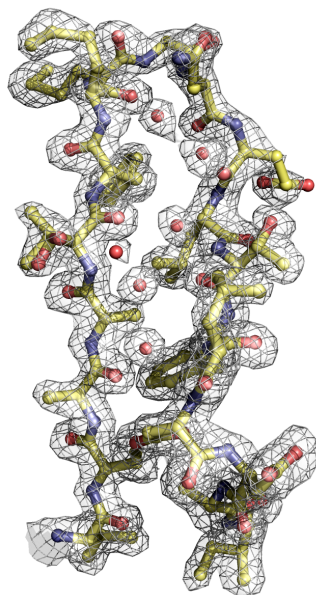

**Figure S1.** Electron density from the final model, showing the networked water spanning the C' and C'' strands of CTLA-4 chain A. The view of the 2Fo-Fc map, contoured at  $\sigma 1.0$ , is identical to that in Fig. 1d, main text.

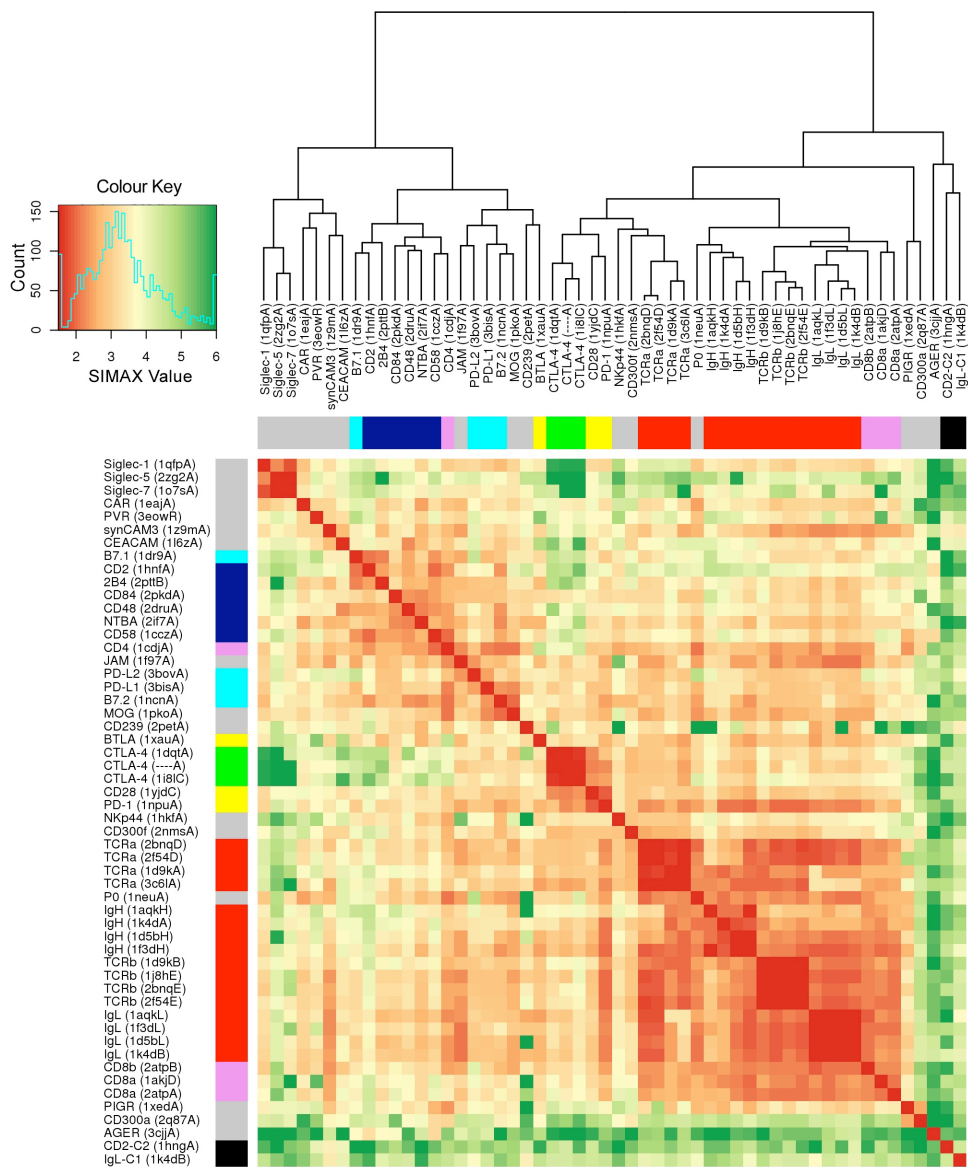

**Fig. S2.** Structural similarity dendrogram and heatmap among a selection of V-set IgSF domains, based on SIMAX scores. Domains are identified by the common short names of the proteins in which they occur, with the identifier and chain letter for the PDB structure used for comparison in brackets. Domains were order according to a dendrogram constructed using complete hierarchical clustering based on scores obtained from pairwise structural comparisons using SIMAX scoring (Dessailly et al., 2009). Colours in the heatmap range from red to dark green for high and low structural similarity, respectively (see colour key). A histogram in the colour key panel shows the frequency distribution of SIMAX scores in the set. Colour bars on the left and upper sides of the heatmap indicate known functional or family groupings: Green – CTLA-4, yellow – other members of the costimulatory/inhibitory family, red – antigen receptors, pink – coreceptors, dark blue – CD2 family, light blue – B7 family, black – outgroup (C1 and C2 set IgSF domains), grey – other V-set proteins.
